# Supplementary material
Source: publisher figshare collection journal article supplement (https://acs.figshare.com/ndownloader/files/6906362)
Supplement: Supplementary file 1 [file 6906362]

## Sheet: Plan1
Description	Group	ΣCoverage	Σ# Proteins	Σ# Unique Peptides	Σ# Peptides	Σ# PSMs	Score A2	Coverage A2	# Peptides A2	# PSM A2	Score A4	Coverage A4	# Peptides A4	# PSM A4	# AAs	MW [kDa]	calc. pI
Laccase (Fragment) OS=Lentinus tigrinus GN=lcc1 PE=1 SV=1 - [Q5EBY5_9APHY]#	Oxidoreductase	11.45	3	3	3	4	10.739	11.45	3	4					463	50.1145	4.99561
Sequence		# PSMs	# Proteins	# Protein Groups	Protein Group Accessions	Modifications	MH+ [Da]	q-Value	PEP	A2	XCorr A2	A4	IonScore A4	Exp Value A4	# Missed Cleavages
STSTPTADLAVISVTK		2	1	1	Q5EBY5		1590.87	0	0.6807	High	3.41166				0
ANPNFGTTGFADGVNSAILR		1	3	1	Q5EBY5		2022.01	0	0.7202	High	2.6168				0
YSFVLNANQDVDNYWIR		1	1	1	Q5EBY5		2117.03	0	0.8527	High	1.98913				0
Laccase OS=Pycnoporus cinnabarinus GN=LCC3-1 PE=1 SV=1 - [LAC1_PYCCI]#	Oxidoreductase	2.9	27	1	1	4	5.7672	2.9	1	2	109.47	2.9	1	2	518	55.9507	5.12256
Sequence		# PSMs	# Proteins	# Protein Groups	Protein Group Accessions	Modifications	MH+ [Da]	q-Value	PEP	A2	XCorr A2	A4	IonScore A4	Exp Value A4	# Missed Cleavages
FPLGADATLINGLGR		4	27	1	O59896		1514.85	0	0.0003502	High	2.9566	High	66.62	5.01962e-06	0
Ligninase OS=Phanerochaete chrysosporium GN=LIG1 PE=3 SV=1 - [Q01775_PHACH]#	Oxidoreductase	3.76	1	1	1	2	6.73609	3.76	1	2					372	39.2473	4.48779
Sequence		# PSMs	# Proteins	# Protein Groups	Protein Group Accessions	Modifications	MH+ [Da]	q-Value	PEP	A2	XCorr A2	A4	IonScore A4	Exp Value A4	# Missed Cleavages
TACEWQSFVANQSK		2	1	1	Q01775	C3(Carbamidomethyl)	1655.72	0	0.8217	High	3.3792				0
Manganese peroxidase 2 OS=Lenzites gibbosa GN=mnp2 PE=2 SV=1 - [G9I531_9APHY]#	Oxidoreductase	8.77	12	1	2	5	20.4196	8.77	2	5					365	38.0458	4.62744
Sequence		# PSMs	# Proteins	# Protein Groups	Protein Group Accessions	Modifications	MH+ [Da]	q-Value	PEP	A2	XCorr A2	A4	IonScore A4	Exp Value A4	# Missed Cleavages
GTLFPGTGGNQGEVESPLHGEIR		3	1	1	G9I531		2352.17	0	0.485927	High	5.52106				0
LQSDSELAR		2	16	2	G9I531;G0Z9F2		1018.53	0	0.8531	High	2.91552				0
Melanin-decolorizing enzyme OS=Ceriporiopsis sp. MD-1 GN=mdcA PE=3 SV=1 - [B3IWB3_9APHY]#	Oxidoreductase	2.51	3	1	1	8	14.4086	2.51	1	8					359	38.2662	5.09717
Sequence		# PSMs	# Proteins	# Protein Groups	Protein Group Accessions	Modifications	MH+ [Da]	q-Value	PEP	A2	XCorr A2	A4	IonScore A4	Exp Value A4	# Missed Cleavages
LQSDHDLAR		8	3	1	B3IWB3		1054.54	0	0.6351	High	2.96483				0
Mn peroxidase MNP3 OS=Polyporus brumalis PE=2 SV=1 - [G0Z9F2_9APHY]#	Oxidoreductase	9.62	15	2	3	17	45.7204	9.62	3	17					364	38.1188	4.57666
Sequence		# PSMs	# Proteins	# Protein Groups	Protein Group Accessions	Modifications	MH+ [Da]	q-Value	PEP	A2	XCorr A2	A4	IonScore A4	Exp Value A4	# Missed Cleavages
LTFHDAIGISPAIASR		12	3	1	G0Z9F2		1668.93	0	0.6673	High	4.07482				0
LQSAFAAAFR		3	4	1	G0Z9F2		1081.58	0	0.8468	High	2.91651				0
LQSDSELAR		2	16	2	G9I531;G0Z9F2		1018.53	0	0.8531	High	2.91552				0
Manganese peroxidase 2 OS=Lenzites gibbosa GN=mnp2 PE=2 SV=1 - [G9I531_9APHY]*	Oxidoreductase	8.77	12	1	2	5	19.9877	8.77	2	5					365	38.0458	4.62744
Sequence		# PSMs	# Proteins	# Protein Groups	Protein Group Accessions	Modifications	MH+ [Da]	q-Value	PEP	A2	XCorr A2	A4	IonScore A4	Exp Value A4	# Missed Cleavages
GTLFPGTGGNQGEVESPLHGEIR		3	1	1	G9I531		2352.17	0	7.64181e-06	High	5.78149				0
LQSDSELAR		2	16	3	G9I531;G0Z9F2;G0Z9F5		1018.53	0	0.119	High	2.69888				0
Mn peroxidase MNP3 OS=Polyporus brumalis PE=2 SV=1 - [G0Z9F2_9APHY]*	Oxidoreductase	9.62	14	1	3	13	37.703	9.62	3	13					364	38.1188	4.57666
Sequence		# PSMs	# Proteins	# Protein Groups	Protein Group Accessions	Modifications	MH+ [Da]	q-Value	PEP	A2	XCorr A2	A4	IonScore A4	Exp Value A4	# Missed Cleavages
LTFHDAIGISPAIASR		9	3	1	G0Z9F2		1668.93	0	0.007559	High	4.11688				0
LQSAFAAAFR		2	4	2	G0Z9F2;G0Z9F5		1081.58	0	0.04109	High	2.92534				0
LQSDSELAR		2	16	3	G9I531;G0Z9F2;G0Z9F5		1018.53	0	0.119	High	2.69888				0
Mn peroxidase MNP6 OS=Polyporus brumalis PE=2 SV=1 - [G0Z9F5_9APHY]*	Oxidoreductase	9.62	12	1	3	5	12.9923	9.62	3	5					364	37.9657	4.42432
Sequence		# PSMs	# Proteins	# Protein Groups	Protein Group Accessions	Modifications	MH+ [Da]	q-Value	PEP	A2	XCorr A2	A4	IonScore A4	Exp Value A4	# Missed Cleavages
LQSAFAAAFR		2	4	2	G0Z9F2;G0Z9F5		1081.58	0	0.04109	High	2.92534				0
LQSDSELAR		2	16	3	G9I531;G0Z9F2;G0Z9F5		1018.53	0	0.119	High	2.69888				0
LTFHDAIGISPAIAAR		1	1	1	G0Z9F5		1652.92	0	0.02244	High	2.35593				0
Laccase (Fragment) OS=Lentinus tigrinus GN=lcc1 PE=1 SV=1 - [Q5EBY5_9APHY]*	Oxidoreductase	11.45	3	3	3	5	17.7	11.45	3	5					463	50.1145	4.99561
Sequence		# PSMs	# Proteins	# Protein Groups	Protein Group Accessions	Modifications	MH+ [Da]	q-Value	PEP	A2	XCorr A2	A4	IonScore A4	Exp Value A4	# Missed Cleavages
ANPNFGTTGFADGVNSAILR		2	3	1	Q5EBY5		2022.02	0	2.623e-05	High	4.58234				0
STSTPTADLAVISVTK		2	1	1	Q5EBY5		1590.88	0	0.003215	High	3.57015				0
YSFVLNANQDVDNYWIR		1	1	1	Q5EBY5		2117.02	0	0.2117	High	2.49176				0
Glucoamylase OS=Phanerochaete carnosa (strain HHB-10118-sp) GN=PHACADRAFT_261990 PE=3 SV=1 - [K5WMZ0_PHACS]*	CAZyme	5.58	1	1	1	2	6.71354	5.58	1	2					573	60.9789	4.67822
Sequence		# PSMs	# Proteins	# Protein Groups	Protein Group Accessions	Modifications	MH+ [Da]	q-Value	PEP	A2	XCorr A2	A4	IonScore A4	Exp Value A4	# Missed Cleavages
SLIDEFVSAEATLQQVTNPSGSVTTGGLGEPK		2	1	1	K5WMZ0		3232.64	0	0.1462	High	3.74144				0
